# Supplementary material for: Circum-Mediterranean cultural heritage and medicinal plant uses in traditional animal healthcare: a field survey in eight selected areas within the RUBIA project
Source: PubMed Central journal article supplement (PMC1447602; doi:10.1186/1746-4269-2-16), 2006-03-24
Supplement: 1746-4269-2-16-S1.pdf [file 1746-4269-2-16-S1.pdf]

Table 1. Recorded veterinary uses of plants in the selected areas

| Botanical taxon and voucher specimen code                 | Botanical family | English name    | Country | Status | Part(s) used              | Administration                                                                  | Application | Animal(s) treated                                                                     | Ethnoveterinary use(s)  | Quotation frequency |
|-----------------------------------------------------------|------------------|-----------------|---------|--------|---------------------------|---------------------------------------------------------------------------------|-------------|---------------------------------------------------------------------------------------|-------------------------|---------------------|
| <i>Acacia nilotica</i> L.<br>M 01                         | Fabaceae         | Egyptian thorn  | Egy     | W      | Fruits and leaflets       | Decoction                                                                       | I           |    | Digestive               | xxx                 |
| <i>Acacia tortilis</i> Forssk.<br>M 02                    | Fabaceae         | Umbrella thorn  | Egy     | W      | Fruits, leaflets and gums | Decoction                                                                       | I           |    | Digestive               | xxx                 |
| <i>Acer monspessulanum</i> L.<br>LEP-ACE                  | Aceraceae        | French maple    | Alb     | W      | Wood                      | Burned, then the cold ashes are mixed with water and given the animals to drink | I           |    | To treat the "evil-eye" | x                   |
| <i>Achillea fragrantissima</i> (Forssk) Sch. Bip.<br>M 03 | Asteraceae       | Lavender cotton | Egy     | W      | Whole plant               | Decoction                                                                       | I           |   | Digestive               | xx                  |
|                                                           |                  |                 | Egy     |        |                           | Topic application                                                               | E           |  | To treat skin diseases  | xx                  |

|                               |                |        |     |   |             |                                                                                                                   |   |                                                                                       |                                                                                       |     |
|-------------------------------|----------------|--------|-----|---|-------------|-------------------------------------------------------------------------------------------------------------------|---|---------------------------------------------------------------------------------------|---------------------------------------------------------------------------------------|-----|
| <i>Allium cepa</i> L.         | Liliaceae s.l. | Onion  | Mor | C | Bulbs       | Fodder (seven onions)                                                                                             | I |    | To facilitate the expulsion of the placenta                                           | xxx |
|                               |                |        | Gre | C | Bulb        | Suppository                                                                                                       | I |    | Digestive                                                                             | x   |
|                               |                |        | Gre |   | Bulb        | Fodder                                                                                                            | I |    | To treat lice and "skin bugs"                                                         | x   |
| <i>Allium sativum</i> L.      | Liliaceae s.l. | Garlic | Mor | C | Bulb        | Fodder (mixed with human urine)                                                                                   | I |    | Digestive                                                                             | xx  |
|                               |                |        | Alg | C | Bulb        | Fodder (mixed with oil oil)                                                                                       | I |    | Vermifuge                                                                             | xx  |
|                               |                |        | Gre | C | Bulb        | Plaster                                                                                                           | E |    | To treat skin diseases and wounds                                                     | x   |
|                               |                |        | Alb | C | Bulb        | One garlic clove is wrapped in a very small piece of cloth, together with two coffee beans and two grains of salt | E |  | Hung on the horn of the animal in order to prevent the evil eye ( <i>syni i keq</i> ) | xxx |
| <i>Althaea officinalis</i> L. | Malvaceae      | Mallow | Mor | W | Whole plant | Wrapped in linen and placed in the oral cavity of the horse                                                       | E |  | To treat oral inflammations                                                           | xx  |

|                                                |                |                         |     |   |              |                                            |   |                                                                                       |                                     |     |
|------------------------------------------------|----------------|-------------------------|-----|---|--------------|--------------------------------------------|---|---------------------------------------------------------------------------------------|-------------------------------------|-----|
| <i>Anabasis articulata</i> (Forssk.) Moq. M 39 | Chenopodiaceae | Berry-bearing glasswort | Egy | W | Aerial parts | Topic application                          | E | 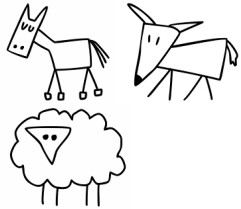   | To treat skin diseases              | xxx |
| <i>Angelica archangelica</i> L.                | Apiaceae       | Angelica                | Mor | C |              | Macerate in vinegar (together with garlic) | I |    | Digestive                           | x   |
| <i>Artemisia absinthium</i> L.                 | Asteraceae     | Wormwood                | Mor | C | Leaves       | Decoction                                  | I |    | Anti-parasitic, Digestive           | x   |
|                                                |                |                         | Alg | W | Aerial part  | Fodder                                     | I |    | Digestive; to heal nervous diseases | xxx |
| <i>Artemisia herba-alba</i> Asso AsAhe01       | Asteraceae     | White artemisia         | Alg | W | Aerial parts | Fodder                                     | I |    | Vermifuge                           | xxx |
|                                                |                |                         | Alg |   |              | Decoction                                  | I |   | To treat "bees diarrhoea"           | xxx |
|                                                |                |                         | Alg |   |              | Smoke from the burning plant               | I |  | Acaricide                           | xxx |
| <i>Artemisia judaica</i> L. M 07               | Asteraceae     | Judean wormwood         | Egy | W | Aerial parts | Decoction                                  | I |  | To heal urinary disorders           | xxx |

|                                                 |                 |                    |     |   |                                 |                                  |   |                                                                                                                                                                                                                                                                                                                                                    |                                                  |     |
|-------------------------------------------------|-----------------|--------------------|-----|---|---------------------------------|----------------------------------|---|----------------------------------------------------------------------------------------------------------------------------------------------------------------------------------------------------------------------------------------------------------------------------------------------------------------------------------------------------|--------------------------------------------------|-----|
|                                                 |                 |                    |     |   |                                 |                                  |   |                                                                                                                                                                                                                                                                 |                                                  |     |
| <i>Asparagus acutifolius</i> L.<br>LiAca01      | Liliaceae s.l.  | Wild asparagus     | Alg | W | Leaves                          | Decoction                        | I |  <br>                                                                                     | To treat stomach disorders                       | xxx |
| <i>Astragalus lusitanicus</i> Lam.<br>GDA 49187 | Fabaceae        | Iberian milk-vetch | Spa | W | Aerial parts                    | Decoction                        | E |                                                                                                                                                                              | To treat skin diseases                           | x   |
| <i>Atraphaxis spinosa</i> L.<br>M 09            | Polygonaceae    |                    | Egy | W | Aerial parts                    | Decoction                        | I |  <br>  | Digestive                                        | x   |
| <i>Atropa belladonna</i> L.                     | Solanaceae      | Deadly nightshade  | Mor | C | Leaves, root and flowering head | Decoction                        | I |                                                                                                                                                                              | To stop coughing and reduce bronchial secretions |     |
| <i>Bufonia multiceps</i> Decne.<br>M 41         | Caryophyllaceae |                    | Egy | W | Entire plant                    | Fodder                           | I |  <br>                                                                               | Digestive                                        | x   |
| <i>Buxus sempervirens</i> L.                    | Buxaceae        | Box                | Mor | W | Leaves                          | Crashed in external applications | E |                                                                                                                                                                                                                                                               | To treat skin inflammations                      | x   |

|                                                                             |                |                  |     |   |             |                               |   |                                                                                       |                                             |    |
|-----------------------------------------------------------------------------|----------------|------------------|-----|---|-------------|-------------------------------|---|---------------------------------------------------------------------------------------|---------------------------------------------|----|
| <i>Calotropis procera</i> Ait.<br>M 12                                      | Asclepiadaceae | Giant milkweed   | Egy | W | Whole plant | Decoction                     | I | 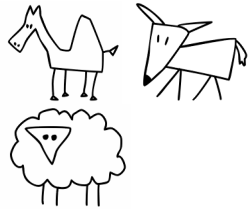   | Digestive                                   | xx |
|                                                                             |                |                  | Egy |   |             | Topic application             | E |    | To treat skin diseases                      | xx |
| <i>Cardopatum corymbosum</i> (L.) Pers.                                     | Asteraceae     | Black chamoeleon | Cyp | W | Roots       | Crushed and applied topically | E |    | To treat wounds, antiseptic                 | xx |
| <i>Carum carvi</i> L.                                                       | Apiaceae       | Caraway          | Mor | C | Fruits      | Crushed in topic application  | E |    | To treat skin lesions                       | xx |
| <i>Centaurea alba</i> L.<br>ssp. <i>tartesiana</i><br>Talavera<br>GDA 49212 | Asteraceae     |                  | Spa | W | Leaves      | Decoction                     | E |   | To treat wounds and callus (hyperkeratosis) | x  |
| <i>Cistus creticus</i> L.<br>and<br><i>C. monspeliensis</i> L.              | Cistaceae      | Rock rose        | Cyp | W | Exudate     | Poultice                      | E |  | To treat skin disorder and belly aches      | xx |

|                                                        |                |               |     |   |              |                                                |   |                                                                                       |                               |    |
|--------------------------------------------------------|----------------|---------------|-----|---|--------------|------------------------------------------------|---|---------------------------------------------------------------------------------------|-------------------------------|----|
| <i>Cistus ladanifer</i><br>L.<br>GDA 49097             | Cistaceae      | Labdanum      | Spa | W | Young stems  | Topic application                              | E | 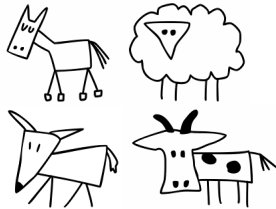   | To heal bruises               | xx |
| <i>Cistus populifolius</i> L.                          | Cistaceae      |               | Spa | W | Leaves       | Decoction                                      | E |    | To heal wounds                | xx |
| <i>Cleome droserifolia</i><br>(Forssk.) Delile<br>M 16 | Capparaceae    |               | Egy | W | Aerial parts | Decoction prepared from the dried aerial parts | I |    | Digestive                     | x  |
| <i>Colchicum autumnale</i> L.                          | Liliaceae s.l. | Autumn crocus | Mor |   | Fruits       | Decoction                                      | I |    | To treat rheumatoid arthritis | x  |
|                                                        |                |               | Mor |   |              |                                                |   |   | Carminative and digestive     | x  |
| <i>Cucurbita pepo</i><br>L.                            | Cucurbitaceae  | Pumpkin       | Mor | C | Seeds        | Fodder, mixed with honey and castor oil        | I |  | Digestive                     | x  |
| <i>Cynara scolymus</i><br>L.                           | Asteraceae     | Artichoke     | Mor | C | Roots        | Decoction                                      | I |  | Digestive                     | xx |

|                                                    |               |                    |     |   |              |                                    |           |                                                                                       |                                   |     |
|----------------------------------------------------|---------------|--------------------|-----|---|--------------|------------------------------------|-----------|---------------------------------------------------------------------------------------|-----------------------------------|-----|
| <i>Cynodon dactylon</i> (L.) Pers.                 | Poaceae       | Bermuda grass      | Ita | W | Entire plant | Fodder                             | I         |    | To treat intestinal inflammations | xxx |
| <i>Daphne gnidium</i> L.<br>GDA 49213              | Thymelaeaceae | Flax-leaved daphne | Spa | W | Bark         | Braided and tied on the neck       | E         |    | To expel the placenta             | xxx |
|                                                    |               |                    |     |   |              | Braided and tied on the neck       | E         |    | Anti-parasitic                    | xxx |
|                                                    |               |                    | Spa |   | Bark         | Tied on the leg                    | E         |    | To treat broken paws              | xx  |
|                                                    |               |                    | Spa |   |              | Tied in the animal's tail (ritual) | E         |   | Anti-diarrheal                    | x   |
| <i>Deverra triradiata</i> Hochst. ex Boiss<br>M 20 | Apiaceae      |                    | Egy | W | Aerial parts | Internal                           | Decoction |  | Digestive                         | x   |

|                                                                          |               |                                |     |   |              |                                                 |   |                                                                                       |                                                          |    |
|--------------------------------------------------------------------------|---------------|--------------------------------|-----|---|--------------|-------------------------------------------------|---|---------------------------------------------------------------------------------------|----------------------------------------------------------|----|
| <i>Dittrichia graveolens</i> (L.) Greuter ETH004                         | Asteraceae    | Stinkwort                      | Gre | W | Aerial parts | Rubbed externally                               | E |    | To treat lice and other bugs                             | xx |
| <i>Dittrichia viscosa</i> (L.) Greuter ETH004                            | Asteraceae    | Sticky fleabane                | Spa | W | Aerial parts | Decoction                                       | E |    | To treat wounds                                          | xx |
| <i>Dorycnium rectum</i> (L.) Ser. GDA 49148                              | Fabaceae      |                                | Spa | W | Aerial parts | Decoction                                       | E |    | To treat wounds and burns                                | xx |
| <i>Equisetum arvense</i> L. BAGN52M                                      | Equisetaceae  | Horsetail                      | Ita | W | Aerial parts | Fodder                                          | I |    | To strengthen their bones                                | x  |
| <i>Euphorbia characias</i> L. and <i>E. dendroides</i> L. ETH0045/ETH045 | Euphorbiaceae | Mediterranean and woody spurge | Gre | W | Latex        | One to two drops of the latex in drinking water | I |    | Digestive                                                | x  |
| <i>Euphorbia helioscopia</i> L. LEP-EUP                                  | Euphorbiaceae | Madwoman's milk                | Alb | W | Aerial parts | Fodder                                          | I |  | Self-medication for cats that have been bitten by snakes | x  |
| <i>Euphorbia hirsuta</i> L. GDA 49227                                    | Euphorbiaceae | Hairy spurge                   | Spa | W | Aerial parts | Decoction                                       | E |  | To treat wounds                                          | x  |



|                                                 |                |                    |     |               |             |                                            |   |                                                                                       |                                |     |
|-------------------------------------------------|----------------|--------------------|-----|---------------|-------------|--------------------------------------------|---|---------------------------------------------------------------------------------------|--------------------------------|-----|
| <i>Fagus sylvatica</i> L.<br>LEP-FAG            | Fagaceae       | Beech              | Alb | W             | Branches    | Used for beating on the ears of the animal | E | 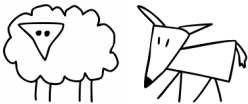   | To treat unidentified diseases | xx  |
| <i>Foeniculum vulgare</i> Mill.                 | Apiaceae       | Fennel             | Mor | W<br>AND<br>C | Whole plant | Decoction                                  | I |    | Digestive                      | xxx |
|                                                 |                |                    | Mor |               | Fruit       | Fodder                                     | I |    | Galactagogue                   | xxx |
|                                                 |                |                    | Alg |               | Fruit       | Fodder                                     | I |    | Galactagogue                   | xxx |
| <i>Fraxinus excelsior</i> L.                    | Oleaceae       | Ash                | Mor | W             | Branches    | Branches are suspended in the cattle shed  | E |    | Protective against viper bites | x   |
| <i>Fraxinus ornus</i> L.<br>ETH071              | Oleaceae       | Manna ash          | Gre | W             | Leaves      | Decoction                                  | I |    | Digestive                      | x   |
| <i>Globularia arabica</i> Jaub. & Spach<br>M 06 | Globulariaceae | Arabian Globularia | Egy | W             | Whole plant | Topic application                          | E |   | To heal wounds                 | x   |
|                                                 |                |                    | Egy |               | Whole plant | Decoction                                  | I |  | Digestive                      | x   |

|                                                      |            |                             |     |   |                |                                |   |                                                                                       |                                                                               |     |
|------------------------------------------------------|------------|-----------------------------|-----|---|----------------|--------------------------------|---|---------------------------------------------------------------------------------------|-------------------------------------------------------------------------------|-----|
| <i>Helichrysum stoechas</i> (L.) Moench<br>GDA 49144 | Asteraceae | Everlasting                 | Spa | W | Aerial parts   | Decoction                      | E | 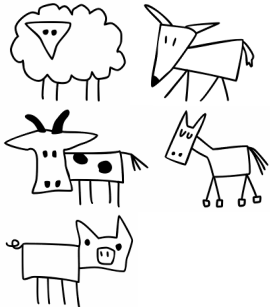   | To heal wounds                                                                | x   |
| <i>Heracleum sphondylium</i> L.<br>LEP-HER           | Apiaceae   | Cow parsnip                 | Alb | W | Aerial parts   | Fodder                         | I |    | To strengthen pigs and as a galactagogue for cows                             | xx  |
| <i>Hypericum maculatum</i> Crantz<br>LEP-HYP         | Guttiferae | Imperforate St. John's wort | Alb | W | Aerial parts   | Decoction                      | I |    | To treat digestive troubles and anti-diarrhea (sheep); antihelmintic (calves) | xx  |
| <i>Hypericum perforatum</i> L.<br>GDA 49068          | Guttiferae | St. John's wort             | Spa | W | Flowering tops | Macerate or fried in olive oil | E |    | To treat wounds                                                               | xxx |
|                                                      |            |                             | Spa |   |                | Maceration                     | E |   | To heal mastitis                                                              | xxx |
|                                                      |            |                             | Spa |   |                | Decoction                      | E |  | To treat bruises                                                              | x   |

|                                          |              |                    |     |    |                   |                                                                                                                                         |   |                                                                                       |                                            |     |
|------------------------------------------|--------------|--------------------|-----|----|-------------------|-----------------------------------------------------------------------------------------------------------------------------------------|---|---------------------------------------------------------------------------------------|--------------------------------------------|-----|
|                                          |              |                    | Mor |    |                   | Macerate in oil                                                                                                                         | E |    | To treat skin disorders and bites          | xx  |
| <i>Juglans regia</i> L.                  | Juglandaceae | Walnut tree        | Mor | SC | Leaves            | Decoction, in external washes                                                                                                           | E |    | To prevent flies                           | xx  |
| <i>Juniperus communis</i> L.             | Cupressaceae | Juniper            | Mor | W  | Fruits            | Macerated with anise fruit and soda                                                                                                     | I |    | Digestive                                  | xxx |
| <i>Juniperus oxycedrus</i> L.            | Cupressaceae | Prickly juniper    | Mor | W  | Fruits            | Macerated in alcohol together with soap powder                                                                                          | I |    | Digestive                                  | x   |
| <i>Juniperus phoenicea</i> L.<br>CuJph01 | Cupressaceae | Phoenician juniper | Alg | W  | Leaves            | Decoction                                                                                                                               | I |    | To treat respiratory diseases              | xxx |
| <i>Laurus nobilis</i> L.                 | Lauraceae    | Bay tree           | Ita | SC | Leaves and fruits | Crushed and cooked in pork fat and applied topically. This product may be preserved, but it needs to be warmed up before it can be used | E |   | To treat contusions and skin inflammations | xx  |
| <i>Lavandula angustifolia</i> Mill.      | Lamiaceae    | Lavender           | Mor | C  | Flowering tops    | Rubbed on externally                                                                                                                    | E |  | To treat local pains                       | x   |
| <i>Lawsonia inermis</i> L.<br>LyL.in01   | Lythraceae   | Henna              | Alg | C  | Leaves            | Ground to a powder and added to fodder                                                                                                  | I |  | To treat constipations                     | xxx |

|                                                 |                |                    |     |   |              |                                                                     |   |                                                                                       |                                |     |
|-------------------------------------------------|----------------|--------------------|-----|---|--------------|---------------------------------------------------------------------|---|---------------------------------------------------------------------------------------|--------------------------------|-----|
|                                                 |                |                    | Mor |   | Leaves       | Ground to a powder,<br>mixed with water and<br>rubbed on externally | E | 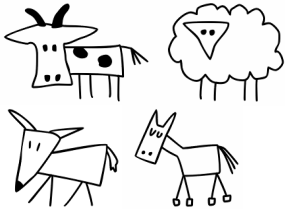   | To treat skin<br>diseases      | xxx |
| <i>Lilium martagon</i><br>L.<br>LEP-LIL         | Liliaceae s.l. | Turk's cap lily    | Alb | W | Bulbs        | Decoction                                                           | I |    | To treat liver<br>diseases     | xx  |
| <i>Linum<br/>usitatissimum</i> L.               | Linaceae       | Flax               | Ita | C | Seeds        | Decoction                                                           | I |    | Emollient                      | xxx |
| <i>Lycium shawii</i><br>Roem. & Schult.<br>M 24 | Solanaceae     | Desert thorn       | Egy | W | Aerial parts | Topic application                                                   | E |    | To treat skin<br>inflammations | xxx |
| <i>Malva sylvestris</i><br>L.<br>GDA 49154      | Malvaceae      | Mallow             | Spa | W | Leaves       | Decoction                                                           | E |   | To treat pimples               | x   |
|                                                 |                |                    | Alg |   | Leaves       | Crushed and applied<br>topically                                    | E |  | Haemostatic                    | xxx |
| <i>Marrubium<br/>vulgare</i> L.<br>GDA 49076    | Lamiaceae      | White<br>horehound | Spa | W | Aerial parts | Decoction                                                           | E |  | To treat wounds                | x   |

|                                               |               |                   |     |   |                |                                               |   |                                                                                       |                                                                 |     |
|-----------------------------------------------|---------------|-------------------|-----|---|----------------|-----------------------------------------------|---|---------------------------------------------------------------------------------------|-----------------------------------------------------------------|-----|
|                                               |               |                   |     |   |                |                                               |   | 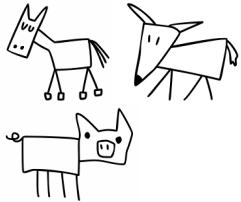   |                                                                 |     |
| <i>Matricaria chamomilla</i> L.<br>ARI 5865   | Asteraceae    | Chamomile         | Cyp | W | Flowering tops | Ground to a powder ,<br>and applied topically | E |    | To treat skin<br>inflammations<br>(especially to kill<br>fleas) | xxx |
| <i>Mentha longifolia</i> (L.)<br>Huds. ETH072 | Lamiaceae     | Horsemint         | Gre | W | Leaves         | Decoction                                     | I |    | Digestive                                                       | xxx |
| <i>Mentha x piperita</i><br>L.                | Lamiaceae     | Peppermint        | Mor | C | Leaves         | Decoction                                     | I |    | Digestive                                                       | xxx |
| <i>Mentha spicata</i> L.<br>ETH073            | Lamiaceae     | Spearmint         | Gre | W | Leaves         | Decoction                                     | I |    | Digestive                                                       | xxx |
| <i>Mercurialis annua</i> L.                   | Euphorbiaceae | Mercury           | Mor | W | Roots          | Decoction                                     | I |  | To treat<br>respiratory<br>diseases                             | xx  |
| <i>Nerium oleander</i><br>L.<br>ApNol01       | Apocynaceae   | Oleander          | Alg | W | Leaves         | Decoction, used in<br>fumigation              | E |  | Thought to<br>evacuate parasites<br>from the brain              | xxx |
| <i>Oenanthe pimpinelloides</i> L.<br>CAP55M   | Apiaceae      | Meadow<br>parsley | Ita | W | Leaves         | Fodder                                        | I |  | To treat stomach's<br>swelling in<br>chicken                    | xxx |

|                                                                              |            |                                |     |         |            |                                                          |   |                                                                                       |                                              |     |
|------------------------------------------------------------------------------|------------|--------------------------------|-----|---------|------------|----------------------------------------------------------|---|---------------------------------------------------------------------------------------|----------------------------------------------|-----|
| <i>Olea europaea</i> L.                                                      | Oleaceae   | Olive tree                     | Cyp | C       | Fruits→Oil | Mixed with <i>Agaricus</i> sp., and rubbed on externally | E |    | To treat skin disorders: and neck wounds     | xxx |
|                                                                              |            |                                | Cyp |         |            | As beverage                                              | I |    | Digestive, as an antidote for food poisoning | xxx |
|                                                                              |            |                                | Cyp |         |            | Mixed with wine, and rubbed on externally                | E |    | Antiseptic                                   | xxx |
| <i>Olea europaea</i> L. and <i>O. europea</i> L. ssp. <i>oleaster</i> ETH076 |            | Olive tree and wild olive tree | Gre | C AND W | Leaves     | Decoction                                                | E |    | To heal eye infections                       | xx  |
| <i>Onopordum</i> sp. GDA 49263                                               | Asteraceae | Cotton thistle                 | Spa | W       | Root       | Decoction                                                | E |   | To treat wounds                              | x   |
| <i>Origanum floribundum</i> Munby LaOf101                                    | Lamiaceae  |                                | Alg | W       | Leaves     | Added to the feed                                        | I |  | Appetizer                                    | xxx |

|                                                                |                |                       |     |   |              |                                 |   |                                                                                       |                                               |     |
|----------------------------------------------------------------|----------------|-----------------------|-----|---|--------------|---------------------------------|---|---------------------------------------------------------------------------------------|-----------------------------------------------|-----|
| <i>Origanum vulgare</i> L. ssp. <i>hirtum</i> Ietswaart ETH063 | Lamiaceae      | Greek oregano         | Gre | W | Leaves       | Decoction                       | I | 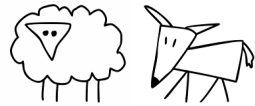   | Digestive                                     | xxx |
| <i>Pallenis spinosa</i> (L.) Cass. GDA 49062                   | Asteraceae     |                       | Spa | W | Aerial parts | Decoction                       | E |    | To heal wounds                                | x   |
| <i>Parietaria diffusa</i> M. et K. CAP56M                      | Urticaceae     | Pellitory of the wall | Ita | W | Aerial part  | Fodder                          | I |    | To cures the stomach's swelling               | xxx |
| <i>Peganum harmala</i> L. M 27                                 | Zygophyllaceae | Syrian rue            | Egy | W | Whole plant  | Decoction                       | I |    | Digestive                                     | xxx |
| <i>Petroselinum crispum</i> (Miller) A.W. Hill.                | Apiaceae       | Parsley               | Mor | C | Aerial parts | Applied topically               | E |    | To relief breast inflammations during weaning | xxx |
| <i>Phlomis purpurea</i> L. GDA 49108                           | Lamiaceae      | Jerusalem sage        | Spa | W | Aerial parts | Applied topically               | E |   | To treat diarrhoea                            | x   |
| <i>Pinus sylvestris</i> L.                                     | Pinaceae       | Scots pine            | Mor | W | Tar          | Applied topically on the muzzle | E |  | Preventive                                    | xx  |

|                                                            |                |                        |     |    |                   |                                                     |   |                                                                                                                                                                                                                                                                      |                            |     |
|------------------------------------------------------------|----------------|------------------------|-----|----|-------------------|-----------------------------------------------------|---|----------------------------------------------------------------------------------------------------------------------------------------------------------------------------------------------------------------------------------------------------------------------|----------------------------|-----|
| <i>Pistacia lentiscus</i><br>L.<br>ARI 5625,<br>ARI 5693   | Anacardiaceae  | Mastix tree            | Cyp | W  | Leaves and stems  | Chewed by a person and then expelled into ox's eyes | E |                                                                                                                                                                                   | To treat eye inflammations | xxx |
|                                                            |                |                        | Alg | W  | Leaves            | Decoction                                           | I |                                                                                                                                                                                   | Digestive                  | xxx |
| <i>Plantago lanceolata</i> L.                              | Plantaginaceae | Narrow-leaved plantain | Mor | W  | Leaves            | Topic application                                   | E |                                                                                                                                                                                   | To treat insect bites      | xx  |
| <i>Plantago major</i> L.<br>CAP58M                         | Plantaginaceae | Common plantain        | Ita | W  | Leaves            | Topic application                                   | E |                                                                                                | To cure skin's infections  | xx  |
| <i>Polygonum aviculare</i><br>L.<br>BAGN34M                | Polygonaceae   | Knotweed               | Ita | W  | Aerial parts      | Fodder                                              | I |                                                                                                                                                                                   | To treat diarrhoea         | x   |
| <i>Potentilla reptans</i><br>L.<br>BAGN54M                 | Rosaceae       | Cinquefoil             | Ita | W  | Aerial parts      | Fodder                                              | I |                                                                                                                                                                                   | To treat diarrhoea         | x   |
| <i>Prunus dulcis</i><br>(Miller) D. A.<br>Webb. var. amara | Rosaceae       | Bitter almond          | Mor | C  | Kernels           | Beverage                                            | I |                                                                                                                                                                                 | Purgative                  | xxx |
| <i>Prunus domestica</i> L.<br>(Rosaceae)<br>LEP-PRU        | Rosaceae       | Wild plum              | Alb | SC | Fruits→distillate | Topic application                                   | E |  <br> | To treat wounds in animals | xxx |



|                                                     |              |                     |     |   |                |                      |   |                                                                                       |                            |     |
|-----------------------------------------------------|--------------|---------------------|-----|---|----------------|----------------------|---|---------------------------------------------------------------------------------------|----------------------------|-----|
| <i>Pteridium aquilinum</i> (L.) Kuhn.               | Pteridiaceae | Bracken fern        | Alb | W | Aerial parts   | Put in stables       | E | 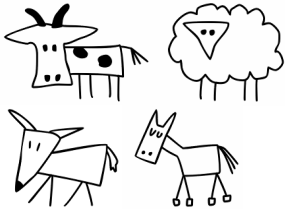   | Antiseptic                 | xx  |
| <i>Pulicaria odora</i> (L.) Reichenb GDA 49066      | Asteraceae   |                     | Spa | W | Flowering tops | Macerated in alcohol | E |    | To heal wounds and bruises | xx  |
|                                                     |              |                     | Spa |   |                | Decoction            | E |    | To treat wounds            | xx  |
| <i>Quercus lusitanica</i> Lam.                      | Fagaceae     | Lusitanian oak      | Mor | W | Gall or seeds  | Fodder               | I |    | Digestive                  | x   |
| <i>Quercus rubra</i> L.                             | Fagaceae     | Red oak             | Mor | W | Branches       | Fodder               | I |    | Anti-diarrhoea             | xv  |
| <i>Retama raetam</i> (Forssk.) Webb. & Berthel M 29 | Fabaceae     | White weeping broom | Egy | W | Aerial parts   | Internal             | I |   | Digestive                  | xxx |
| <i>Rhamnus alaternus</i> L. RhRa01                  | Rhamnaceae   | Evergreen buckthorn | Alg | W | Leaves         | Decoction            | I |  | To treat stomach swelling  | xx  |

|                                                             |              |                  |     |   |                |                                           |   |                                                                                       |                                      |     |
|-------------------------------------------------------------|--------------|------------------|-----|---|----------------|-------------------------------------------|---|---------------------------------------------------------------------------------------|--------------------------------------|-----|
| <i>Rhamnus alpinus</i><br>L.<br>LEP-RHA                     | Rhamnaceae   | Alpine buckthorn | Alb | W | Aerial parts   | Decoction, used in washes                 | E |    | To heal eczemas                      | x   |
| <i>Rorippa nasturtium-aquaticum</i> (L.)<br>Hayek<br>CAP53M | Brassicaceae | Watercress       | Ita | W | Aerial parts   | Decoction                                 | I |    | Diuretic                             | xxx |
| <i>Rosa arabica</i><br>Crép.<br>M 30                        | Rosaceae     | Sweet briar rose | Egy | W | Whole plant    | Decoction                                 | I |    | To treat reproductive troubles       | x   |
| <i>Rosmarinus officinalis</i> L.                            | Lamiaceae    | Rosemary         | Mor | C | Flowering tops | Decoction, in external baths              | E |    | To treat "fever" (parasites?)        | xx  |
| <i>Rumex acetosa</i> L.                                     | Polygonaceae | Sorrel           | Ita | W | Aerial parts   | Fodder                                    | I |    | Laxative                             | x   |
| <i>Ruta chalepensis</i><br>L.<br>ARI 5565, ARI 5604         | Rutaceae     | Egyptian rue     | Cyp | W | Aerial parts   | Ground to a powder and dissolved in water | I |   | To prevent microbic infections       | xxx |
|                                                             |              |                  |     |   | Aerial parts   | Rubber externally on wounds               |   |  | To bind flies and prevent infections | x   |
| ETH074                                                      |              |                  | Gre | W | Leaves         | Decoction                                 | I |  | Digestive                            | xx  |

|                                                                    |                |                    |     |   |                                  |                                                    |   |                                                                                       |                                                                     |     |
|--------------------------------------------------------------------|----------------|--------------------|-----|---|----------------------------------|----------------------------------------------------|---|---------------------------------------------------------------------------------------|---------------------------------------------------------------------|-----|
| <i>Salvia officinalis</i><br>L.                                    | Lamiaceae      | Sage               | Mor | C | Aerial parts                     | Decoction                                          | I |    | To treat respiratory troubles                                       | xx  |
| <i>Sambucus nigra</i><br>L.<br>ARI 5619                            | Caprifoliaceae | Elderberry tree    | Cyp | C | Inflorescence                    | Decoction                                          | E |    | To treat eye inflammations and ski disorders (also as a preventive) | xx  |
| <i>Sanguisorba minor</i><br>L.<br>LEP-SAN                          | Rosaceae       | Salad burnet       | Alb | W | Aerial parts                     | Cut, mixed with salt, and then rubbed on the udder | E |    | To heal mastitis                                                    | x   |
| <i>Senecio jacobaea</i><br>L. GDA 49130                            | Asteraceae     |                    | Spa | W | Aerial parts (including flowers) | Decoction                                          | E |    | To treat wounds                                                     | xxx |
|                                                                    |                |                    | Spa |   |                                  | Macerate in olive oil and alcohol                  | E |    | To treat mastitis                                                   | x   |
| <i>Tanacetum santolinooides</i><br>(DC.) Feinbrun & Fertig<br>M 40 | Asteraceae     |                    | Egy | W | Aerial parts                     | Decoction                                          | I |   | Digestive                                                           | x   |
| <i>Taraxacum laevigatum</i> DC.<br>AsTla01                         | Asteraceae     | Red-seed dandelion | Alg | W | Leaves                           | Fodder                                             | I |  | Laxative                                                            | xxx |
| <i>Thymus vulgaris</i><br>L.                                       | Lamiaceae      | Thyme              | Mor | W | Flowering tops                   | Decoction                                          | E |  | To heal wounds, mouth and udder inflammations                       | xxx |

|                                                   |             |           |     |   |             |                                                                                   |   |                                                                                       |                                                                                                     |     |
|---------------------------------------------------|-------------|-----------|-----|---|-------------|-----------------------------------------------------------------------------------|---|---------------------------------------------------------------------------------------|-----------------------------------------------------------------------------------------------------|-----|
|                                                   |             |           |     |   |             |                                                                                   |   |    |                                                                                                     |     |
| <i>Trigonella foenum-graecum</i> L.               | Fabaceae    | Fenugreek | Mor | C | Seeds       | Fodder                                                                            | I |    | To enhance the quality of the hair                                                                  | xxx |
|                                                   |             |           | Alg | C | Seeds       | Fodder                                                                            | I |    | To strengthen the animal (increasing its weight); especially administered before the animal is sold | xxx |
| <i>Tuberaria lignosa</i> (Sweet) Stamp. GDA 49158 | Cistaceae   |           | Spa | W | Aerial part | Decoction                                                                         | E |    | To treat wounds                                                                                     | xxx |
| <i>Verbena officinalis</i> L. GDA 49140           | Verbenaceae | Vervain   | Spa | W | Leaves      | Decoction                                                                         | E |   | Antiseptic after castration                                                                         | x   |
| <i>Zea mays</i> L.                                | Poaceae     | Corn      | Ita | C | Seeds       | The seeds are decocted in water and/ or milk; the decoction is applied externally | E |  | To treat mastitis                                                                                   | x   |

Alb: Albania; Alg: Algeria; Cyp: Cyprus; Egy: Egypt; Gre: Greece; Ita: Italy; Mor: Morocco; Spa: Spain; C: cultivated; SC: semi-cultivated; W: wild; E: external; I: internal; x: rare use (use quoted by less than 10% of the informants); xx: common use (use quoted by more than 10% and less than 40% of the informants); xxx: very common use (use quoted by more than 40% of the informants)

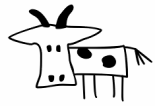

cattle

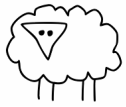

sheep

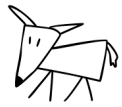

goats

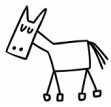

equines

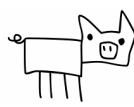

swine

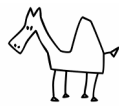

camels

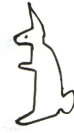

rabbits

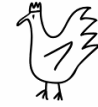

poultry

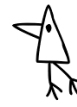

birds

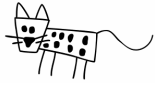

cats

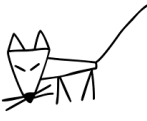

dogs

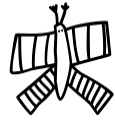

bees
